# Supplementary material for: High Influenza Vaccine Effectiveness and Absence of Increased Influenza-like-Illness Epidemic Activity in the 2021–2022 Influenza Season in Catalonia (Spain) Based on Surveillance Data Collected by Sentinel Pharmacies
Source: MDPI journal article supplement (doi:10.3390/vaccines10122140), 2022-12-14
Supplement: s1 [file s1]

## Supplement Materials

Table S1. Percentage of influenza-like illness cases reported by sentinel pharmacies that had received a previous medical visit in Catalonia (Spain) in the 2021-2022 influenza season

Table S2. Percentage of patients with influenza-like illness cases illness (ILI) that sentinel pharmacies dispensed medications and physicians prescribed medications in Catalonia (Spain) in the 2021-2022 influenza season

Table S3. Drugs dispensed by sentinel pharmacies and drugs prescribed by physicians to influenza-like illness patients in Catalonia (Spain) in the 2021–2022 influenza season

Table S1. Percentage of influenza-like illness cases reported by sentinel pharmacies that had received a previous medical visit in Catalonia (Spain) in the 2021-2022 influenza

| Influenza-like illness (ILI) cases reported by sentinel pharmacies in the 2021-2022 influenza season |                 |                  |     |                                                |                  |     |
|------------------------------------------------------------------------------------------------------|-----------------|------------------|-----|------------------------------------------------|------------------|-----|
| Age                                                                                                  | Total ILI cases |                  |     | ILI cases with a negative COVID-19 test result |                  |     |
|                                                                                                      | No.             | % (95% CI)       | n   | No.                                            | % (95% CI)       | n   |
| <b>Both sexes</b>                                                                                    |                 |                  |     |                                                |                  |     |
| 0-4 years                                                                                            | 13              | 68.4 (43.4-87.4) | 19  | 6                                              | 66.7 (29.9-92.5) | 9   |
| 5-14 years                                                                                           | 7               | 21.9 (6.0-37.8)  | 32  | 4                                              | 25.0 (7.3-52.4)  | 16  |
| 15-64 years                                                                                          | 107             | 34.0 (28.6-39.4) | 315 | 74                                             | 44.3 (36.5-52.1) | 167 |
| ≥ 65 years                                                                                           | 13              | 36.1 (19.5-53.2) | 36  | 10                                             | 50.0 (25.6-74.4) | 20  |
| Total                                                                                                | 140             | 34.8 (30.0-39.6) | 402 | 94                                             | 44.3 (37.4-51.3) | 212 |
| <b>Men</b>                                                                                           |                 |                  |     |                                                |                  |     |
| 0-4 years                                                                                            | 9               | 69.2 (38.6-90.9) | 13  | 7                                              | 57.1 (18.4-90.1) | 7   |
| 5-14 years                                                                                           | 3               | 16.7 (3.6-41.4)  | 18  | 9                                              | 22.2 (22.2-60.0) | 9   |
| 15-64 years                                                                                          | 47              | 29.9 (22.4-37.4) | 157 | 81                                             | 40.7 (29.4-52.1) | 81  |
| ≥ 65 years                                                                                           | 6               | 50.0 (21.1-78.9) | 12  | 6                                              | 66.7 (22.8-95.7) | 6   |
| Total                                                                                                | 65              | 32.5 (25.8-39.2) | 200 | 103                                            | 41.7 (31.7-51.8) | 103 |
| <b>Women</b>                                                                                         |                 |                  |     |                                                |                  |     |
| 0-4 years                                                                                            | 4               | 66.7 (22.3-95.7) | 6   | 2                                              | 100.0 (15.8-100) | 2   |
| 5-14 years                                                                                           | 4               | 28.6 (8.4-58.1)  | 14  | 7                                              | 28.6 (3.7-71.0)  | 7   |
| 15-64 years                                                                                          | 60              | 38.0 (30.1-45.6) | 158 | 86                                             | 47.7 (36.5-58.8) | 86  |
| ≥ 65 years                                                                                           | 7               | 29.2 (12.1-51.1) | 24  | 14                                             | 42.9 (17.7-71.1) | 14  |
| Total                                                                                                | 75              | 37.1 (30.2-44.0) | 202 | 109                                            | 46.8 (37.0-56.6) | 109 |

Table S2. Percentage of patients with influenza-like illness cases illness (ILI) that sentinel pharmacies dispensed medications and physicians prescribed medications in Catalonia (Spain) in the 2021-2022 influenza season

| Age         | ILI cases with dispended medications |                  |     | ILI cases with prescribed medications |                  |     |
|-------------|--------------------------------------|------------------|-----|---------------------------------------|------------------|-----|
|             | No.                                  | % (95% CI)       | n   | No.                                   | % (95% CI)       | n   |
| Both sexes  |                                      |                  |     |                                       |                  |     |
| 0-4 years   | 17                                   | 89.5 (66.9–98.7) | 19  | 12                                    | 63.2 (38.4–83.7) | 19  |
| 5-14 years  | 30                                   | 93.8 (79.2–99.2) | 32  | 6                                     | 18.8 (7.2–36.4)  | 32  |
| 15-64 years | 296                                  | 94.0 (91.2–96.8) | 315 | 92                                    | 29.2 (24.0–34.4) | 315 |
| ≥ 65 years  | 34                                   | 94.4 (81.3–99.3) | 36  | 12                                    | 33.3 (16.5–50.1) | 36  |
| Total       | 377                                  | 93.8 (91.3–96.3) | 402 | 122                                   | 30.3 (25.7–35.0) | 402 |
| Men         |                                      |                  |     |                                       |                  |     |
| 0-4 years   | 12                                   | 92.3 (64.0–99.8) | 13  | 8                                     | 61.5 (31.6–86.1) | 13  |
| 5-14 years  | 16                                   | 88.9 (65.3–98.6) | 18  | 3                                     | 16.7 (3.6–41.4)  | 18  |
| 15-64 years | 146                                  | 93.0 (88.7–97.3) | 157 | 42                                    | 26.7 (19.5–34.0) | 157 |
| ≥ 65 years  | 12                                   | 100.0 (73.5–100) | 12  | 6                                     | 50.0 (21.1–78.9) | 12  |
| Total       | 186                                  | 93.0 (89.2–96.8) | 200 | 59                                    | 29.5 (22.9–36.1) | 200 |
| Women       |                                      |                  |     |                                       |                  |     |
| 0-4 years   | 5                                    | 83.3 (35.9–99.0) | 6   | 4                                     | 66.7 (22.8–95.7) | 6   |
| 5-14 years  | 14                                   | 100.0 (76.8–100) | 14  | 3                                     | 21.4 (4.7–50.8)  | 14  |
| 15-64 years | 150                                  | 94.9 (91.2–98.7) | 158 | 50                                    | 31.6 (24.1–39.2) | 158 |
| ≥ 65 years  | 22                                   | 91.7 (73.1–99.0) | 24  | 6                                     | 25.0 (9.8–46.7)  | 24  |
| Total       | 191                                  | 94.6 (91.2–97.9) | 202 | 63                                    | 31.2 (24.5–37.6) | 202 |

Table S3. Drugs dispensed by sentinel pharmacies and drugs prescribed by physicians to influenza-like illness patients in Catalonia (Spain) in the 2021–2022 influenza season

| Drug                 | Drugs dispensed<br>(n = 402) |                  | Drugs prescribed<br>(n = 402) |                  |
|----------------------|------------------------------|------------------|-------------------------------|------------------|
|                      | No.                          | % (95% CI)       | No.                           | % (95% CI)       |
| Paracetamol          | 308                          | 76.6 (72.3–80.9) | 96                            | 23.9 (19.6–28.2) |
| Ibuprofen            | 83                           | 20.6 (16.6–24.7) | 37                            | 9.2 (6.2–12.1)   |
| Acetylsalicylic acid | 7                            | 1.7 (0.3–3.1)    | 1                             | 0.2 (0.0–1.4)    |
| Cough medication     | 110                          | 27.4 (22.9–31.8) | 31                            | 7.7 (5.0–10.4)   |
| Antihistamines       | 89                           | 22.1 (18.0–26.3) | 20                            | 5.0 (2.7–7.2)    |
| Epinephrine          | 32                           | 8.0 (5.2–10.7)   | 3                             | 0.7 (0.1–2.2)    |
| Antibiotic           | 19                           | 4.7 (2.5–6.9)    | 19                            | 4.7 (2.5–6.9)    |
| Antiseptic           | 11                           | 2.7 (1.0–4.4)    | 2                             | 0.5 (0.0–1.8)    |
| Mucolytic            | 27                           | 6.7 (4.1–9.3)    | 11                            | 2.7 (1.0–4.4)    |
| Medicinal plants     | 11                           | 2.7 (1.0–4.4)    | 1                             | 0.2 (0.0–1.4)    |
| Bronchodilator       | 8                            | 2.0 (0.5–3.5)    | 4                             | 1.0 (0.3–2.5)    |
| Anti-inflammatory    | 7                            | 1.7 (0.3–3.1)    | 3                             | 0.7 (0.1–2.2)    |
| Oseltamivir          | 1                            | 0.2 (0.0–1.4)    | 1                             | 0.2 (0.0–1.4)    |
